# Supplementary material for: Long non-coding RNA Peg13 attenuates the sevoflurane toxicity against neural stem cells by sponging microRNA-128-3p to preserve Sox13 expression
Source: PubMed Central journal article supplement (PMC7725402; doi:10.1371/journal.pone.0243644), 2020-12-09

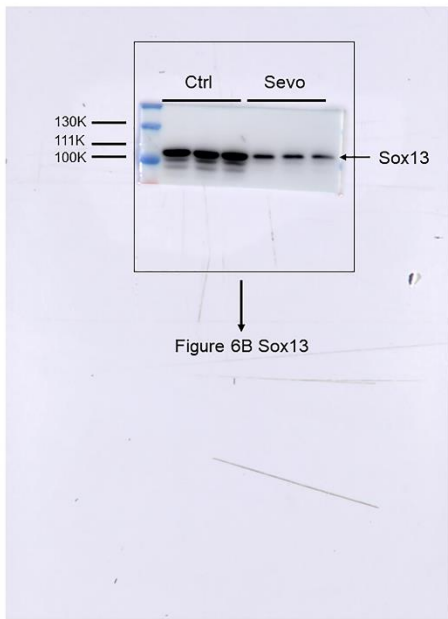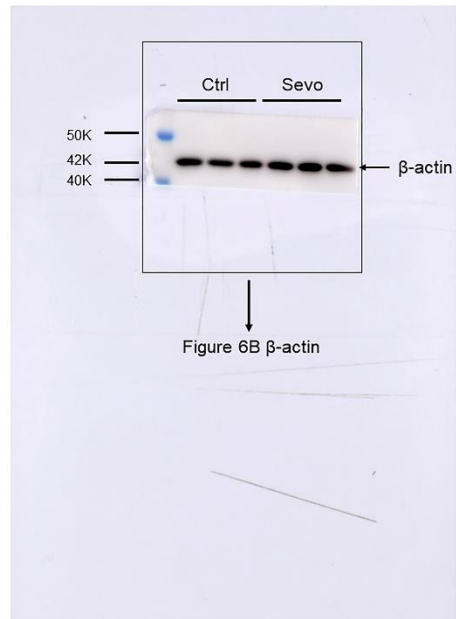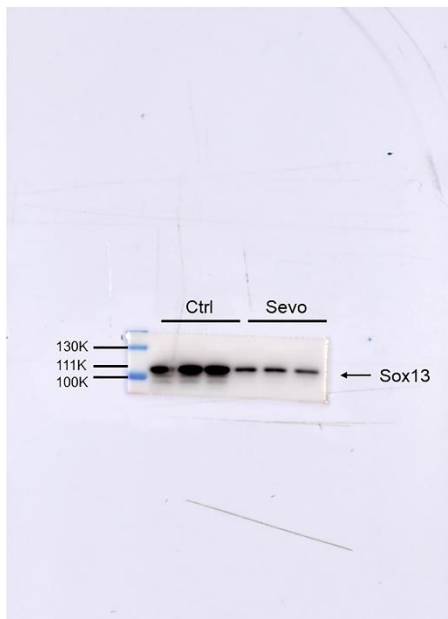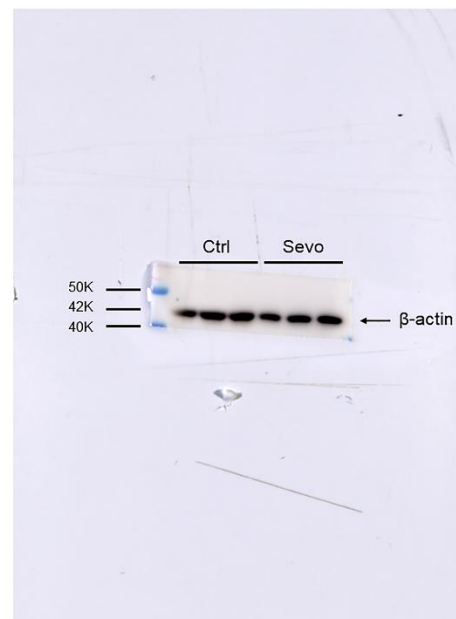

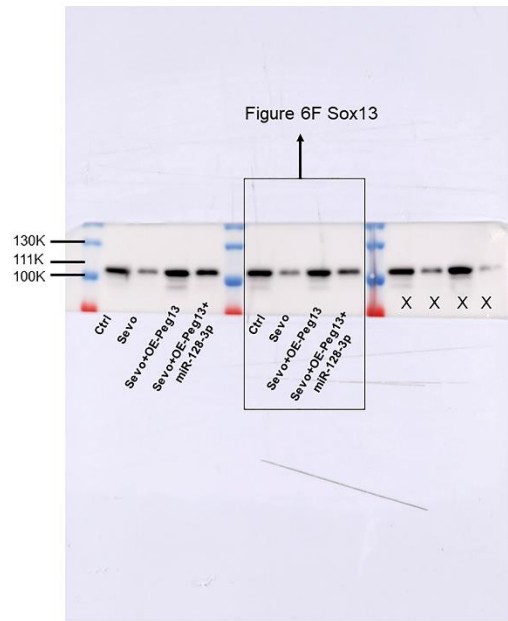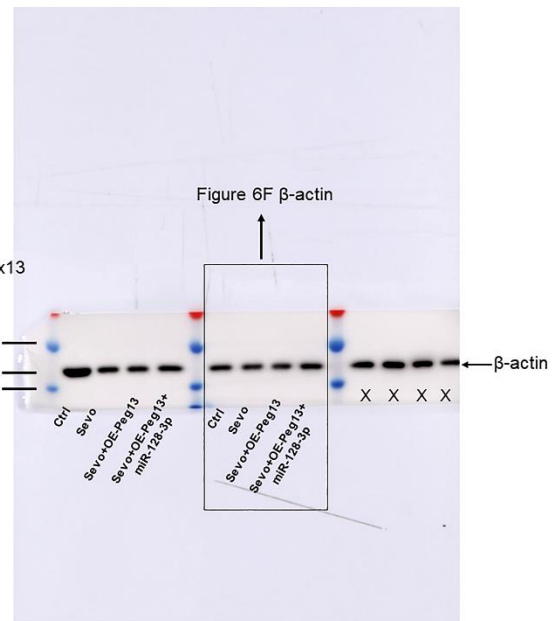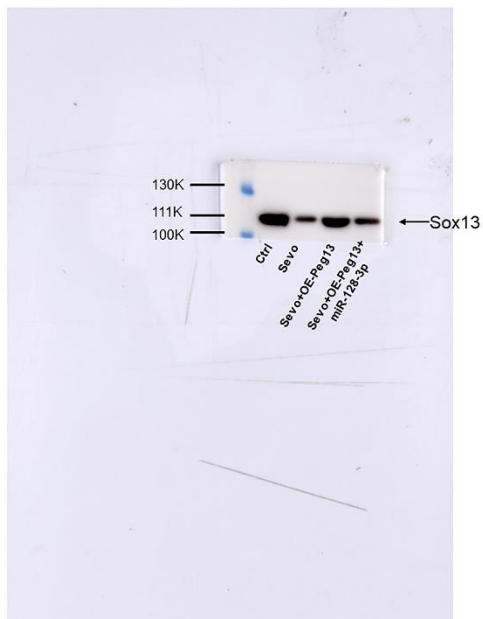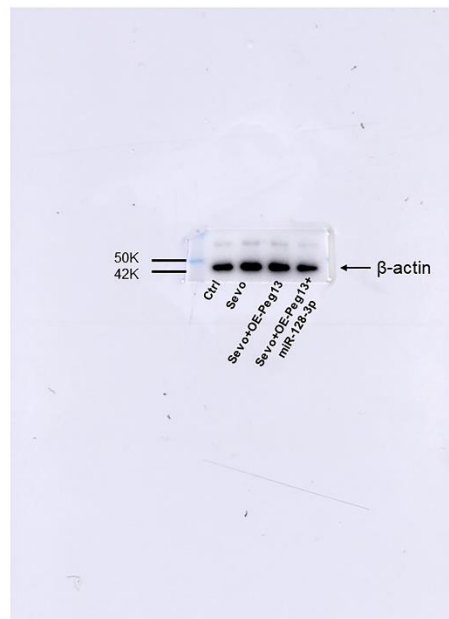

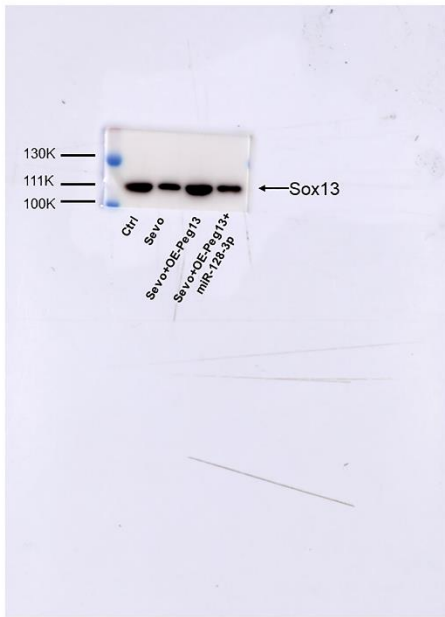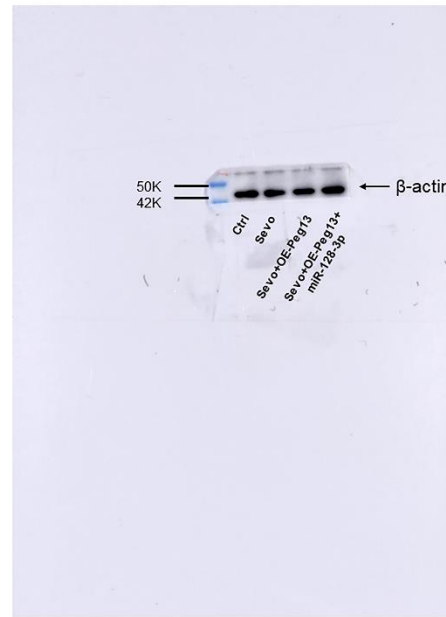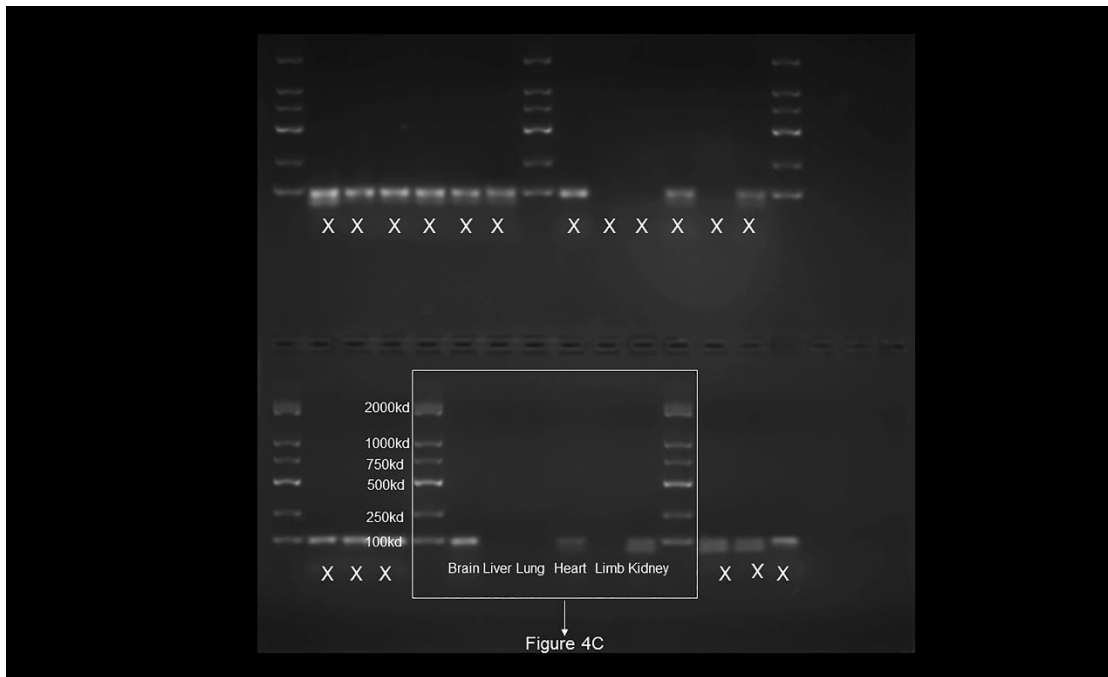

Supplement: pone.0243644.s001.pdf [file pone.0243644.s001.pdf]
